# Supplementary material for: Improving Inpatient Surveys: Web-Based Computer Adaptive Testing Accessed via Mobile Phone QR Codes
Source: PubMed Central journal article supplement (PMC4795329; doi:10.2196/medinform.4313), 2016-03-02
Supplement: medinform_v4i1e8_app1.pdf [file medinform_v4i1e8_app1.pdf]

### 39. Were you ever in any pain?

1.  Yes      —> Go to 40

2.  No      —> Go to 41

### 40. Do you think the hospital staff did everything they could to help control your pain?

1.  Yes, definitely ( score 10 points)

2.  Yes, to some extent (score 5 points)

3.  No ( score 0 point)

### 41. How many minutes after you used the call button did it usually take before you got the help you needed?

1.  0 minutes / right away ( 10 points)

2.  1-2 minutes (7.5 points)

3.  3-5 minutes ( 5 points)

4.  More than 5 minutes ( 2.5 points)

5.  I never got help when I used the call button ( 0 points)

6.  I never used the call button
