# Supplementary material for: Improving Inpatient Surveys: Web-Based Computer Adaptive Testing Accessed via Mobile Phone QR Codes
Source: PubMed Central journal article supplement (PMC4795329; doi:10.2196/medinform.4313), 2016-03-02
Supplement: medinform_v4i1e8_app6.pdf [file medinform_v4i1e8_app6.pdf]

# **A Web-Based Computerized Adaptive Testing (CAT) to Assess Patient Perception in Hospitalization**

Tsair-Wei Chien, Wen-Chung Wang

# Features

- **CAT-format questionnaire come from a previous paper**
- **Step threshold difficulties yielded**
- **Item bank prepared**
- **Logic of CAT**
- **The Rasch rating scale model**
- **A Web-Based Computerized Adaptive Testing (CAT)**
- **Newton-Raphson method, information, SE and outfit**
- **Select & present optimal scale item**
- **A screencast of the module**
- **CAT item-by-item selection report for an examinee**
- **How to simulate Rasch data**
- **Control file of WINSTEPS to gain measures of NAT**
- **Comparison of CAT and NAT in efficiency**

# CAT-format questionnaire

- An IPQ-18 presented in a previous paper:  
**Chien TW, Wang WC, Wang HY, Lin HJ:**  
Online assessment of patients' views on  
hospital performances using Rasch  
model's KIDMAP diagram. ***BMC Health  
Serv Res. 2009;9:135.***  
<http://www.biomedcentral.com/1472-6963/9/135>

# Step (threshold) difficulties are yielded

- The category Rasch-Andrich thresholds (step difficulties) were ordered as **-3.76, -1.91, 1.57 and 4.11**.  
<http://www.biomedcentral.com/1472-6963/9/135>
- Ex. Overall difficulty=3.78 for item 39 yields step difficulty as followings:  
step 1 = **0.02**[3.78+(-3.76)],  
step 2 = **1.87**[3.78+(-1.91)],  
step 3 = **5.35**[3.78+1.57],  
step 4 = **7.89**[3.78+4.11].

# Item bank prepared in Excel

## Overall Step difficulties

| Item_no | Items     | difficulty | b1    | b2    | b3   | b4   | desp1       | desp2         | desp3 | desp4     | desp5      |
|---------|-----------|------------|-------|-------|------|------|-------------|---------------|-------|-----------|------------|
| 1       | Staff.... | 3.78       | 0.02  | 1.87  | 5.35 | 7.89 | Strongly NS | Not Satisfied | Fair  | Satisfied | Strongly S |
| 2       | Docto.... | 2.76       | -1    | 0.85  | 4.33 | 6.87 | Strongly NS | Not Satisfied | Fair  | Satisfied | Strongly S |
| 3       | Hospi.... | 2.22       | -1.54 | 0.31  | 3.79 | 6.33 | Strongly NA | Not Agree     | Fair  | Agree     | Strongly A |
| 4       | Ever .... | 1.58       | -2.18 | -0.33 | 3.15 | 5.69 | Hard to     | Tolerance     | Fair  | A little  | None       |
| 5       | Were .... | 0.67       | -3.09 | -1.24 | 2.24 | 4.78 | Strongly NA | Not Agree     | Fair  | Agree     | Strongly A |
| 6       | How l.... | 0.42       | -3.34 | -1.49 | 1.99 | 4.53 | Strongly NS | Not Satisfied | Fair  | Satisfied | Strongly S |
| 7       | Staff.... | -0.3       | -4.06 | -2.21 | 1.27 | 3.81 | Strongly NS | Not Satisfied | Fair  | Satisfied | Strongly S |
| 8       | You f.... | -0.63      | -4.39 | -2.54 | 0.94 | 3.48 | Strongly NS | Not Satisfied | Fair  | Satisfied | Strongly S |
| 9       | How w.... | -0.71      | -4.47 | -2.62 | 0.86 | 3.4  | Strongly NS | Not Satisfied | Fair  | Satisfied | Strongly S |
| 10      | How o.... | -0.95      | -4.71 | -2.86 | 0.62 | 3.16 | Strongly NS | Not Satisfied | Fair  | Satisfied | Strongly S |
| 11      | Were .... | -1.08      | -4.84 | -2.99 | 0.49 | 3.03 | Strongly NS | Not Satisfied | Fair  | Satisfied | Strongly S |
| 12      | Bothe.... | -1.1       | -4.86 | -3.01 | 0.47 | 3.01 | Hard to     | Tolerance     | Fair  | A little  | None       |
| 13      | Havin.... | -1.1       | -4.86 | -3.01 | 0.47 | 3.01 | None        | Hard to       | Fair  | A little  | Trust      |
| 14      | Staff.... | -1.1       | -4.86 | -3.01 | 0.47 | 3.01 | Strongly NA | Not Agree     | Fair  | Agree     | Strongly A |
| 15      | Staff.... | -1.1       | -4.86 | -3.01 | 0.47 | 3.01 | Strongly NA | Not Agree     | Fair  | Agree     | Strongly A |
| 16      | Docto.... | -1.12      | -4.88 | -3.03 | 0.45 | 2.99 | Strongly NA | Not Agree     | Fair  | Agree     | Strongly A |
| 17      | You g.... | -1.12      | -4.88 | -3.03 | 0.45 | 2.99 | Strongly NA | Not Agree     | Fair  | Agree     | Strongly A |
| 18      | Hospi.... | -1.12      | -4.88 | -3.03 | 0.45 | 2.99 | Strongly NA | Not Agree     | Fair  | Agree     | Strongly A |

# Logic of CAT

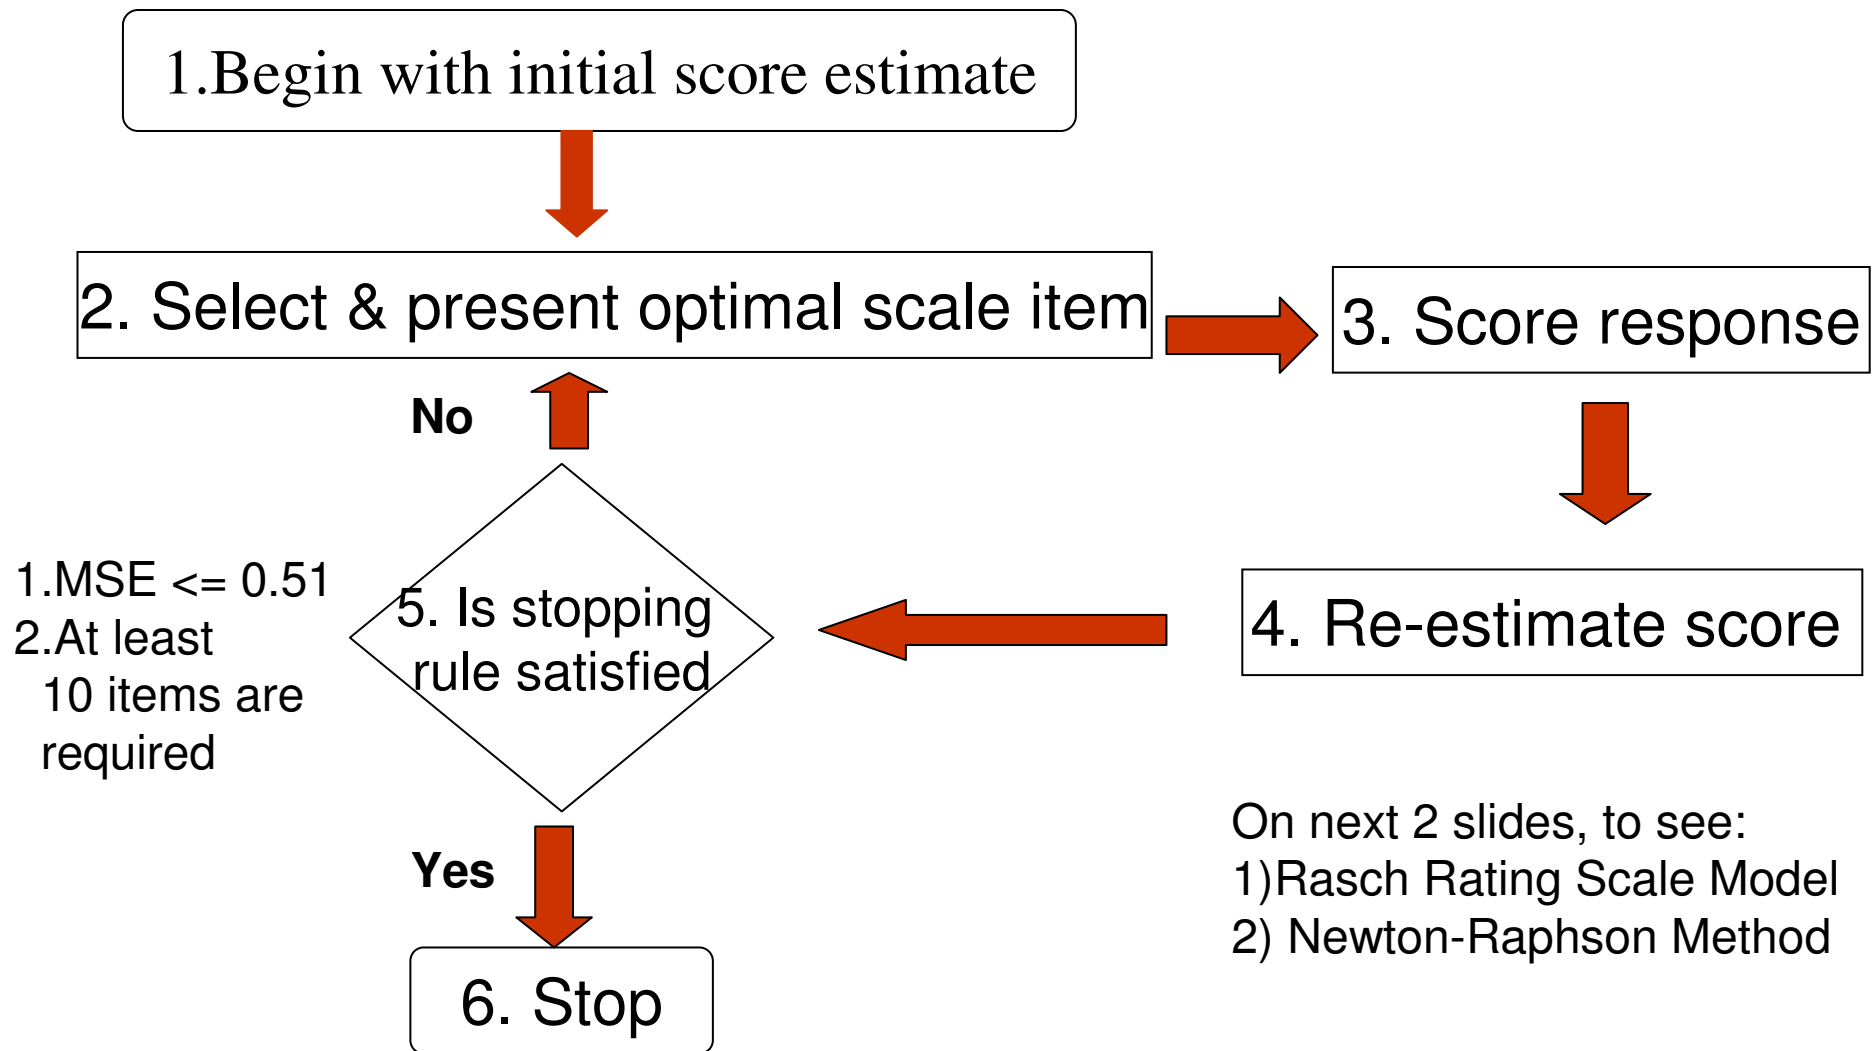

# The Rasch rating scale model (RSM)

Person ability

Overall difficulty

Step difficulty

$$P(X_{ni} = x) = \frac{\exp \sum_{j=0}^x [\beta_n - (\delta_i + \tau_j)]}{\sum_{k=0}^m \exp \sum_{j=0}^k [\beta_n - (\delta_i + \tau_j)]}, x = 0, 1, \dots, m$$
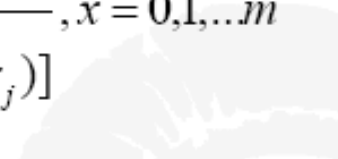

Where  $P(X_{ni} = x)$  is the probability that a person  $n$  is assigned to rating scale category  $x$  on item  $i$ , each item has  $m + 1$  rating scale categories

And

$$\sum_{j=0}^0 [\beta_n - (\delta_i + \tau_j)] = 0$$

# Newton-Raphson method, information, SE and outfit

- **To re-estimate score** (When provisional estimate of a person and item difficulties known)
  - for Newton=1 to n
  - for item=1 to selected item
  - $\text{first\_order} = \text{first\_D} + (\text{obs. score} - \text{expected score})$  ----->
  - $\text{second\_order} = \text{second\_D} + \text{variance}$
  - $\text{information} = \text{information} + \text{variance}$  ----->
  - next item
  - **SE** =  $1 / \text{information}^{0.5}$
  - $\text{Ability} = \text{Ability} - \text{first\_order} / \text{second\_order}$
  - Convergency to a limit
    - if  $|\text{abs}(\text{first\_order} / \text{second\_order})| < .05$  then exit for
  - next Newton
- -----
- **To obtain the probability, variance and outfit MNSQ**
  - a) Compute the cumulative exponential of observing each category, ex. A1,a1... was shown in previous slide
  - b)  $\text{ALL\_p} = a_0 + a_1 + a_2 + a_3 + a_4$
  - c) The **expected score** for each item =  $(0) * a_0 / \text{all\_p} + (1) * a_1 / \text{all\_p} + (2) * a_2 / \text{all\_p} + (3) * a_3 / \text{all\_p} + (4) * a_4 / \text{all\_p}$
  - d) The variance for each item is stated as:
    - $\text{variance} = a_0 / \text{all\_p} * (0 - \text{ex})^2 + a_1 / \text{all\_p} * (1 - \text{ex})^2 + a_2 / \text{all\_p} * (2 - \text{ex})^2 + a_3 / \text{all\_p} * (3 - \text{ex})^2 + a_4 / \text{all\_p} * (4 - \text{ex})^2$
    - $\text{Zsquare} = (\text{obs. score} - \text{ex})^2 / \text{var}$
  - for j=1 to selected item
    - **outfit** = outfit + Zsquare(i)
  - next j

Stop  
rule

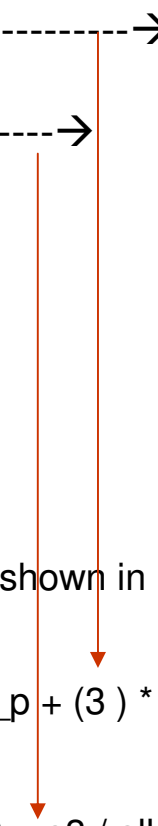



# Select & present optimal scale item by Select the maximum information for unselected items

Information=variance =  $a_0 / \text{all\_p} * (0 - \text{ex})^2 + a_1 / \text{all\_p} * (1 - \text{ex})^2 + a_2 / \text{all\_p} * (2 - \text{ex})^2 + a_3 / \text{all\_p} * (3 - \text{ex})^2 + a_4 / \text{all\_p} * (4 - \text{ex})^2$

- **expected score** for each item =  $(0) * a_0 / \text{all\_p} + (1) * a_1 / \text{all\_p} + (2) * a_2 / \text{all\_p} + (3) * a_3 / \text{all\_p} + (4) * a_4 / \text{all\_p}$

$$P(X_{ni} = x) = \frac{\exp \sum_{j=0}^x [\beta_n - (\delta_i + \tau_j)]}{\sum_{k=0}^m \exp \sum_{j=0}^k [\beta_n - (\delta_i + \tau_j)]}, x = 0, 1, \dots, m$$

# A screencast of the module in Excel

2. Select & present optimal scale item

1. Begin with initial score estimate

CAT based inpatient satisfaction survey



| No | Measure | response | z-score |
|----|---------|----------|---------|
| 10 | 3.14    | 3        | 0.77    |
| 5  | 2.47    | 4        | 1.88    |
| 4  | 2.1     | 3        | 0.79    |
| 1  | 1.87    | 2        | 0.26    |
| 2  | 1.67    | 3        | 1.58    |
| 3  | 1.19    | 3        | 1.22    |
| 6  | 0.64    | 4        | 1.73    |
| 9  | -4.39   | 3        | 0.62    |
| 8  | -2.21   | 1        | 3.97    |
| 7  | 0       | 2        | 2.03    |

| Item | Items               | difficult |
|------|---------------------|-----------|
| 1    | Staff told you abo  | 3.78      |
| 2    | Doctors or nurses   | 2.76      |
| 3    | Hospital staff talk | 2.22      |
| 4    | Ever bothered by    | 1.58      |
| 5    | Were you involve    | 0.67      |
| 6    | How long after usi  | 0.42      |
| 7    | Staff told you how  | -0.3      |
| 8    | You feel wait a lon | -0.63     |
| 9    | How would you ra    | -0.71     |
| 10   | How organized wa    | -0.95     |
| 11   | Were you given ei   | -1.08     |
| 12   | Bothered by noise   | -1.1      |
| 13   | Having confidence   | -1.1      |
| 14   | Staff saying one t  | -1.1      |
| 15   | Staff explained th  | -1.1      |
| 16   | Doctors talked in f | -1.12     |
| 17   | You get answers t   | -1.12     |
| 18   | Hospital staff did  | -1.12     |

1.NO: 001414 + Date: 2010/10/24

email: [ ]

2. Over satisfied

Gender [ ] Age [ ] Dept [ ] Proxv [ ]

Extreme N
  Very NS
  Not Sati.
  Fair
  Satisfied
  Very Sati.
  Extreme S

How organized was the care you received in A&E?

Strongly [ ] Not Sati [ ] Fair [ ] Satisfiec [ ] Strongly [ ]

Start End Scoring to\_excel

製Output Satisfied 3.14

SE 0.47

Inform 4.53

Outfit 3.21

Infit 3.3

Item 10

send by mail

Next Guide

Item Bank

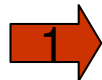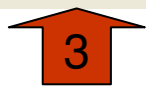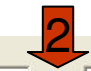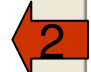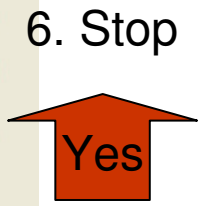

3. Score response

2. Select

5. Is stopping rule satisfied

4. Re-estimate score

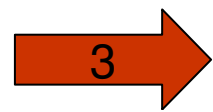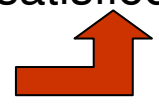

# A web-based computerized adaptive testing (CAT)

- <http://www.healthup.org.tw/cat.asp>

## Inpatient survey on CAT

eMail or self-design number:

1. overall  extremely not satisfied  very not satisfied  not satisfied  fair  satisfied  very satisfied  extreme satisfied

2. Type of hospital  H1  Hosital\_A  Hosital\_B  Hosital\_C  Hosital\_D  Hosital\_E  Hosital\_F

## Inpatient survey CAT(IRT-polytomy) 12211: [To Start](#)

[!]

10(item answered)

Estimate = 0 SE\_dif=0 MSE=0 Outfit MNSQ=0 At least 10 items

[CAT Tutorial](#) examinee:12211 your placement:

|                                         |                                                                            |                                                                                                                                                                                                                     |
|-----------------------------------------|----------------------------------------------------------------------------|---------------------------------------------------------------------------------------------------------------------------------------------------------------------------------------------------------------------|
| <input type="button" value="Re-start"/> | Indicators(To see item after clicking)                                     | To select one appropriate feeling                                                                                                                                                                                   |
| R14-10                                  | 23. Did staff say one thing and something quite different happened to you? | <input type="button" value="Strongly Agree"/> <input type="button" value="Agree"/> <input type="button" value="Fair"/> <input type="button" value="Not Agree"/><br><input type="button" value="Strongly disagree"/> |

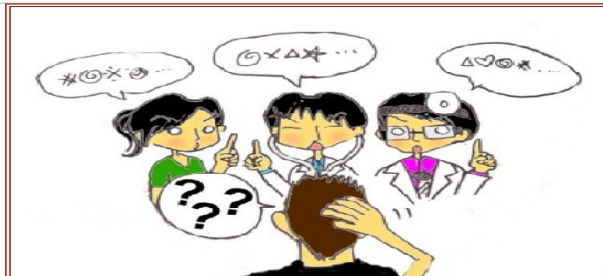

# CAT item-by-item selection report for an examinee

This test terminated when the SE less than

0.5

Minimum number of items =

10

Maximum number of items

= 18

Examinee Name:

Theta was estimated by maximum likelihood

Examinee ID: 001412

The standard error band plotted as that pluses mor minumes MSE around theta

Date tested: #####

X=initial theta value C=Correct answer I=incorrect answer

| Item | Theta | SE   | -6 | -5 | -4 | -3          | -2          | -1          | 0 | 1 | 2 | 3 | 4 | 5 | 6 | Z     |
|------|-------|------|----|----|----|-------------|-------------|-------------|---|---|---|---|---|---|---|-------|
| 7    | 0     | 0    |    |    |    | -----3----- |             |             |   |   |   |   |   |   |   | >     |
| 6    | 1.27  | 0    |    |    |    |             | -----2----- |             |   |   |   |   |   |   |   | >     |
| 8    | -1.49 | 0    |    |    |    |             |             | -----1----- |   |   |   |   |   |   |   | 2.41* |
| 9    | 0.2   | 0.67 |    |    |    |             | -----3----- |             |   |   |   |   |   |   |   |       |
| 4    | 0.36  | 0.62 |    |    |    |             | -----2----- |             |   |   |   |   |   |   |   |       |
| 5    | 0.72  | 0.59 |    |    |    |             |             | -----3----- |   |   |   |   |   |   |   |       |
| 3    | 0.85  | 0.55 |    |    |    |             |             | -----2----- |   |   |   |   |   |   |   |       |
| 1    | 0.86  | 0.52 |    |    |    |             |             | -----1----- |   |   |   |   |   |   |   |       |
| 2    | 0.52  | 0.49 |    |    |    |             |             | -----0----- |   |   |   |   |   |   |   |       |
| 10   | 0.53  | 0.47 |    |    |    |             |             | -----2----- |   |   |   |   |   |   |   |       |

>Arbitrarily assigned value, These values were not used to terminate the test.

\* |Z|>2 denotes that unexpected response occurred

The final theta estimate based on the tested items was 0.53 with a standard error of 0.47, resulting in a standard error band of 6.00000000000001E-02 to 1

# How to simulate Rasch data

- **Person measures and item difficulties (including step difficulties) known after CAT**
- **How to Simulate Rasch Data**

|   | A     | B    | C    | D    | E    | F    | G    | H    | I     | J     | K     | L  |
|---|-------|------|------|------|------|------|------|------|-------|-------|-------|----|
| 1 | 4     | 3.78 | 2.76 | 2.22 | 1.58 | 0.67 | 0.42 | -0.3 | -0.63 | -0.71 | -0.95 | -1 |
| 2 | 3.14  | 1    | 1    | 2    | 2    | 2    | 3    | 2    | 3     | 3     | 3     | 2  |
| 3 | 3.88  | 3    | 3    | 2    | 2    | 3    | 3    | 4    | 4     | 4     | 4     | 4  |
| 4 | 2.17  | 1    | 1    | 2    | 3    | 2    | 3    | 4    | 3     | 3     | 3     | 3  |
| 5 | -0.03 | 0    | 1    | 2    | 1    | 2    | 2    | 2    | 2     | 2     | 2     | 2  |
| 6 | 3.5   | 2    | 3    | 2    | 2    | 3    | 3    | 4    | 3     | 4     | 4     | 3  |
| 7 | 4.3   | 3    | 3    | 2    | 4    | 3    | 3    | 4    | 4     | 4     | 4     | 3  |

Using a item response generation method that has been introduced at <http://www.rasch.org/rmt/rmt213a.htm> to generate 18-question responses for each patient when question difficulties and patient perception measure (by CAT) are known.

# WINSTEPS control file to yield measures of NAT

- &INST ; this starts the control specifications; it is optional
- TITLE = 'LIKING FOR SCIENCE (Wright & Masters p.18)'
- NI = 18 ; 25 items
- ITEM1 = 1 ; responses start in column 1 of the data
- NAME1 = 12 ; person-label starts in column 28 of the data
- ITEM = ACT ; items are called "activities"
- PERSON= KID ; persons are called "kids"
- CODES = 0123456789 ; valid response codes (ratings) are 0, 1, 2
- CLFILE=\* ; label the response categories
- 0 Dislike ; names of the response categories
- 1 Neutral
- 2 Like
- \* ; "\*" means the end of a list
- IAFILE=\*
- 1 3.78
- 2 2.76
- 3 2.22
- 4 1.58
- 5 0.67
- 6 0.42
- 7 -0.3
- 8 -0.63
- 9 -0.71
- 10 -0.95
- 11 -1.08
- 12 -1.1
- 13 -1.1
- 14 -1.1
- 15 -1.1
- 16 -1.12
- 17 -1.12
- 18 -1.12
- \*
- NUMB=Y
- &END ; this ends the control specifications
- ;data shown as followings:
- 021222211223232222
- 22122213333333442
- .....

Using the 18-question response to re-estimate NAT responses for each patient using WINSTEPS software [17] (when 18-question difficulties are known using WINSTEPS anchored command file Shown In left, so that the comparison. in efficiency can be made in next slide.

# Comparison of CAT and all answered items (NAT) in efficiency with paired t-test

|                    | Mea<br>n | Varia<br>nce | Respo<br>nse | Maxim<br>um | Minim<br>um | t     | <i>Prob.&gt;<br/>Z</i> |
|--------------------|----------|--------------|--------------|-------------|-------------|-------|------------------------|
| Test length:       |          |              |              |             |             |       |                        |
| NAT                | 18       | 0.00         | 3600         | 18          | 18          | -     |                        |
|                    | 10.4     |              |              |             |             | 476.7 | < .001                 |
| CAT                | 2        | 0.25         | 2084         | 12          | 10          | 2     |                        |
| Estimated ability: |          |              |              |             |             |       |                        |
| NAT                | 0.69     | 2.66         | 3600         | 4.16        | -2.69       |       |                        |
| CAT                | 0.71     | 2.62         | 2084         | 4.00        | -2.56       | 1.10  | 0.14                   |
